# Supplementary material
Source: PubMed Central journal article supplement (PMC6517268)
Supplement: EMS81028-supplement-Supplementary_Figure_S1.pdf [file EMS81028-supplement-Supplementary_Figure_S1.pdf]

## Supplementary Figure S1

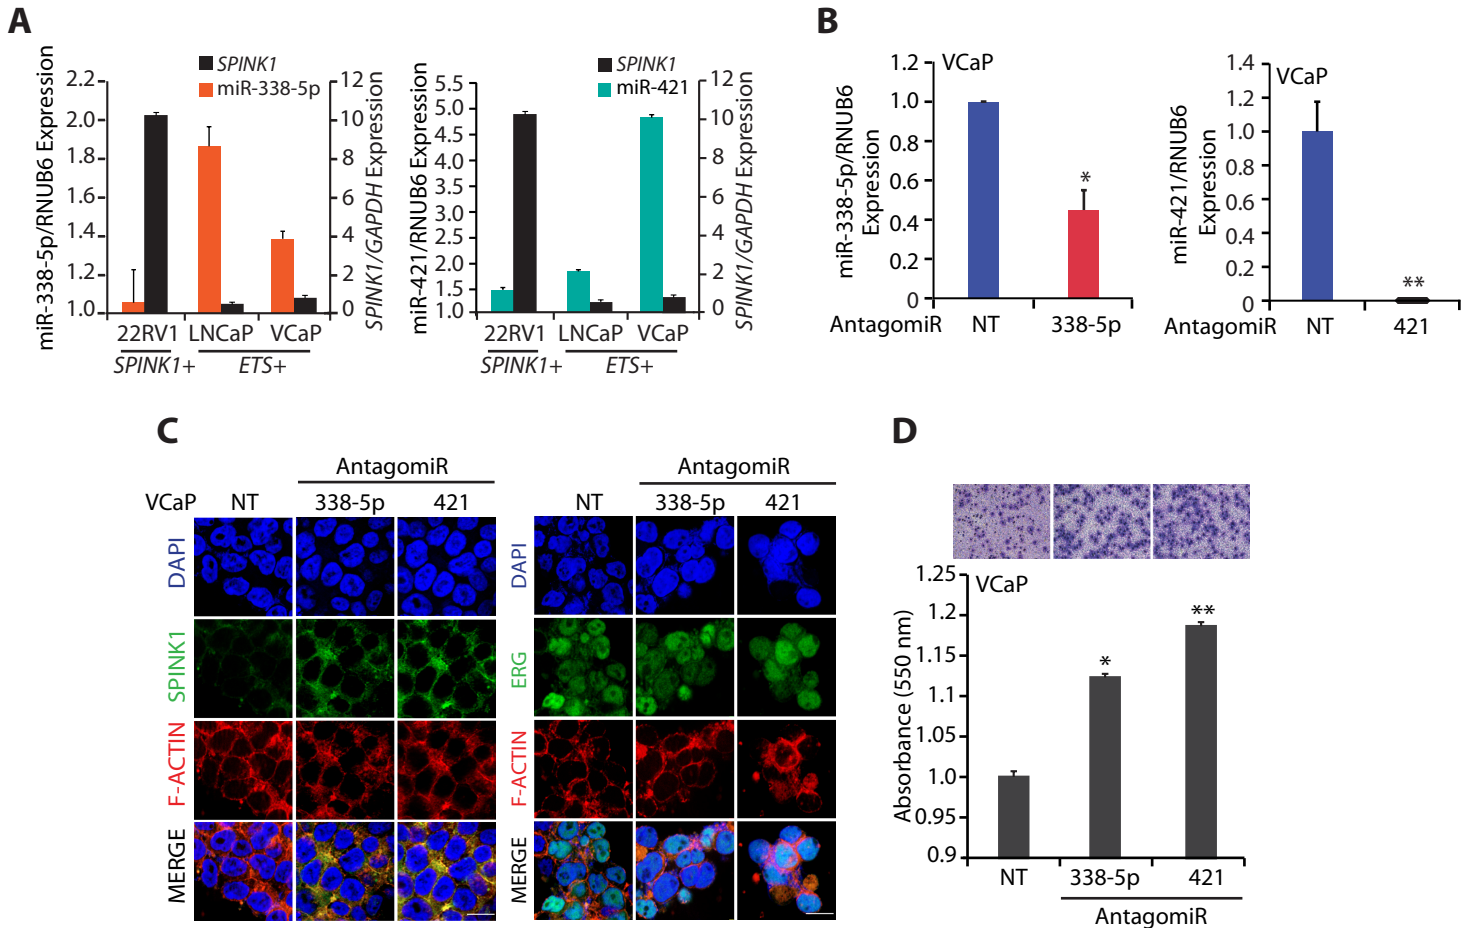

**Supplementary Figure S1. MiR-338-5p and miR-421 expression is associated with lower Gleason score and clinical stage and antagomiRs against miR-338-5p/-421 induce SPINK1 expression in VCaP cells.**

**A.** QPCR data showing relative expression of *SPINK1*, miR-338-5p and miR-421 in 22RV1 (*SPINK1*+), LNCaP and VCaP (*ETS*+) PCa cells ( $n=3$  biologically independent samples). **B.** Taqman microRNA assay showing relative expression of miR-338-5p and miR-421 in VCaP cells transfected with antagomiRs for respective miRNAs. **C.** Immunostaining for *SPINK1* (left panel) and *ERG* (right panel) using same cells as in (B), scale bar represents 20 $\mu$ m. **D.** Transwell migration assay using same cells as in (B). Representative fields of the migrated cells are shown in the inset.

Bar plot represent mean  $\pm$  SEM. \* $P \leq 0.05$  and \*\* $P \leq 0.001$  using two-tailed unpaired Student's *t* test.
