# Supplementary material
Source: PubMed Central journal article supplement (PMC6517268)
Supplement: EMS81028-supplement-Supplementary_Figure_S5.pdf [file EMS81028-supplement-Supplementary_Figure_S5.pdf]

## Supplementary Figure S5

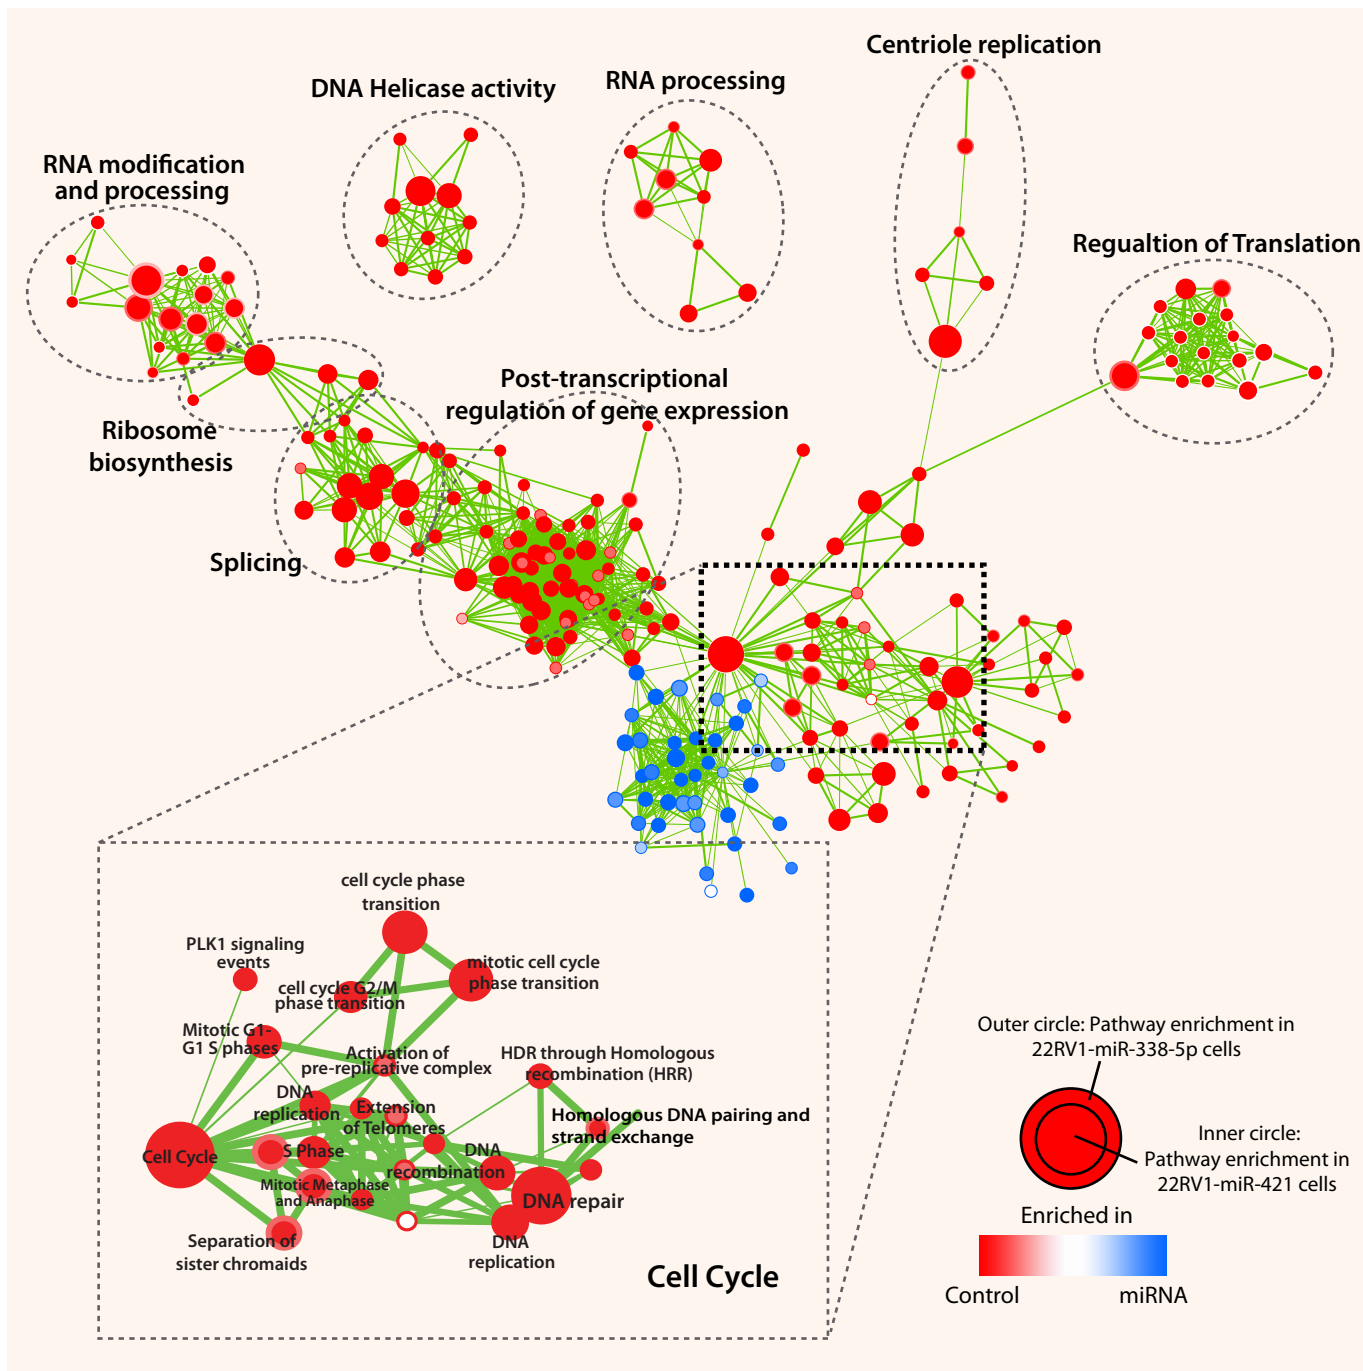

### Supplementary Figure S5. Comprehensive enrichment map showing integration of biological networks.

Enrichment map depicting various overlapping biological pathways, including cell cycle and DNA repair (shown in inset) as the most significantly regulated pathways by both miR-338-5p and miR-421 in 22RV1 cells ( $p < 0.001$ ,  $FDR = 0.01$ , Pearson's correlation). Each node corresponds to specific Gene Ontology (GO) term and the size of nodes indicates significance associated with it. Thickness of the green lines connecting the nodes represents connections between the overlapping genesets. The Red color represents pathways enriched in control whereas blue represents pathways enriched in miR-338-5p/miR-421 overexpressing cells. Color intensity of the outer and inner circle is proportional to enrichment significance. Clusters of functionally related gene-sets were manually circled by dotted lines and assigned a label.
