# Supplementary material
Source: PubMed Central journal article supplement (PMC6517268)
Supplement: EMS81028-supplement-Supplementary_Figure_S6.pdf [file EMS81028-supplement-Supplementary_Figure_S6.pdf]

# Supplementary Figure S6

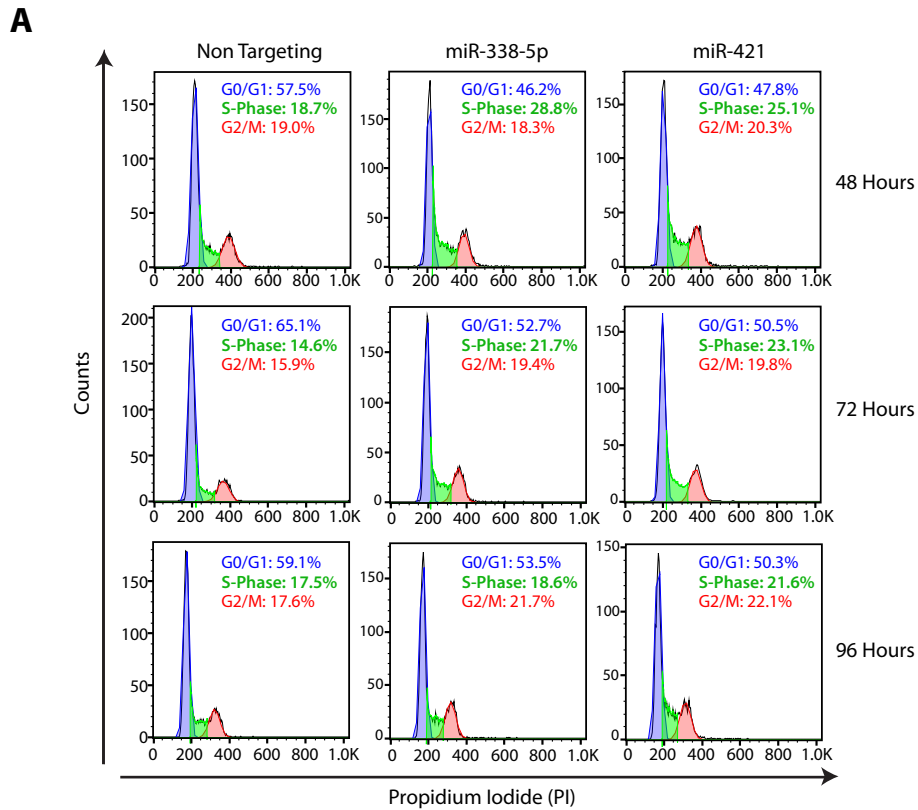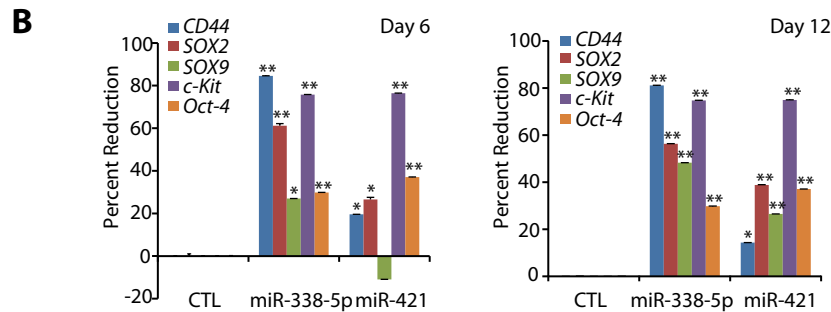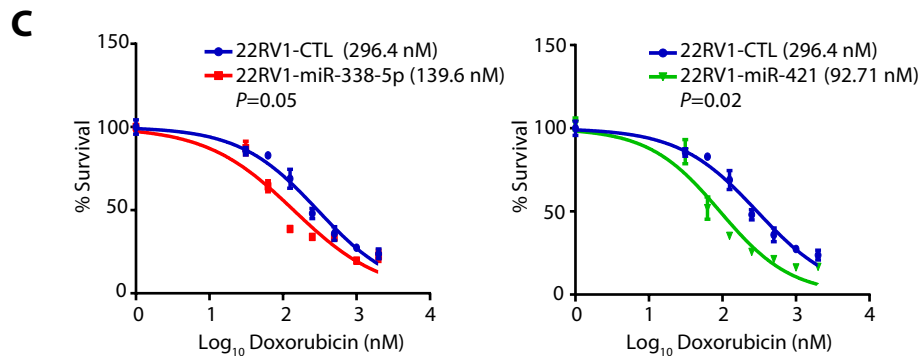

## Supplementary Figure S6. MiR-338-5p and miR-421 induces S-phase arrest and confers sensitivity to chemotherapeutic drugs.

**A.** Flow cytometric analysis using propidium iodide DNA staining demonstrate cell cycle arrest in 22RV1 cells transfected with miR-338-5p and miR-421 mimics at the indicated time points. **B.** QPCR analysis of stem cell markers using prostatosphere derived from 22RV1-miR-338-5p, 22RV1-miR-421 and 22RV1-CTL cells. Bar plot represent mean  $\pm$  SEM. \*\* $P \leq 0.005$  and \* $P \leq 0.05$  using two-tailed unpaired Student's *t* test. **C.** Cytotoxicity assay using doxorubicin in same cells as in (B). Cells were treated with increasing concentration of doxorubicin, followed by colorimetric WST assay. IC<sub>50</sub> values were calculated by generating dose-response curve using GraphPad Prism.
