# Supplementary material
Source: PubMed Central journal article supplement (PMC6517268)
Supplement: EMS81028-supplement-Supplementary_Table_S1.pdf [file EMS81028-supplement-Supplementary_Table_S1.pdf]

**Supplementary Table S1:**Computational prediction of microRNAs with putative binding sites on the 3'-UTR of *SPINK1*.

| miRNA            | miRmap       | miRanda      | PITA             | RNAhybrid                 |
|------------------|--------------|--------------|------------------|---------------------------|
|                  | miRmap score | miRSVR score | $\Delta\Delta G$ | Minimum free energy (MFE) |
| hsa-miR-338-5p   | 55.47        | -0.0179      | -0.5             | -17.9                     |
| hsa-miR-421      | 68.52        | -0.3016      | -0.84            | -18.1                     |
| hsa-miR-876-5p   | 33.46        | -0.3056      | -0.37            | -13.1                     |
| hsa-miR-1290     | 53.65        | -0.0186      | NA               | -18.9                     |
| hsa-miR-3142     | 57.73        | -0.0146      | NA               | -21.3                     |
| hsa-miR-3201     | 56.89        | -0.1204      | NA               | -16.8                     |
| hsa-miR-1972     | 71.47        | -0.0179      | NA               | -30.7                     |
| hsa-miR-4272     | 74.3         | -1.2505      | NA               | -13.9                     |
| hsa-miR-3065-5p  | 70.46        | -0.2641      | NA               | -14.3                     |
| hsa-miR-215      | 26.56        | -0.0142      | -2.92            | NA                        |
| hsa-miR-769-3p   | NA           | -0.0106      | -16.17           | -19.8                     |
| hsa-miR-1305     | NA           | -0.1897      | -0.27            | -13.4                     |
| hsa-miR-607      | NA           | -0.1453      | -0.88            | -12.3                     |
| hsa-miR-494      | 67.15        | NA           | -2.5             | NA                        |
| hsa-miR-5100     | 53.6         | NA           | NA               | -11.9                     |
| hsa-miR-3661     | 50.11        | NA           | NA               | -22.1                     |
| hsa-miR-192      | NA           | -0.0142      | -3.92            | NA                        |
| hsa-miR-616      | NA           | -0.1023      | 3.25             | NA                        |
| hsa-miR-659      | NA           | -0.2752      | -1.89            | NA                        |
| hsa-miR-542-5p   | NA           | -0.305       | -1.49            | NA                        |
| hsa-miR-550      | NA           | -0.1782      | -9.61            | NA                        |
| hsa-miR-505      | NA           | -0.1006      | -3.64            | NA                        |
| hsa-miR-1323     | NA           | -0.0225      | NA               | -16.8                     |
| hsa-miR-3167     | NA           | -0.2929      | NA               | -23                       |
| hsa-miR-935      | NA           | NA           | -8.75            | -24.1                     |
| hsa-miR-554      | NA           | NA           | 2.83             | -21.3                     |
| hsa-miR-375      | NA           | NA           | -12.42           | -13.4                     |
| hsa-miR-769-5p   | NA           | NA           | -16.17           | -19.8                     |
| hsa-miR-4261     | 87.64        | NA           | NA               | NA                        |
| hsa-miR-3978     | 73.2         | NA           | NA               | NA                        |
| hsa-miR-4704-3p  | 45.68        | NA           | NA               | NA                        |
| hsa-miR-4709-5p  | 67.53        | NA           | NA               | NA                        |
| hsa-miR-1245b-5p | 46.17        | NA           | NA               | NA                        |
| hsa-miR-4746-3p  | 71.91        | NA           | NA               | NA                        |
| hsa-miR-4717-5p  | 70.12        | NA           | NA               | NA                        |
| hsa-miR-3529-3p  | 44.48        | NA           | NA               | NA                        |
| hsa-miR-4502     | 48.5         | NA           | NA               | NA                        |
| hsa-miR-4791     | 44.48        | NA           | NA               | NA                        |
| hsa-miR-373      | NA           | -0.1023      | NA               | NA                        |
| hsa-miR-488      | NA           | -0.3481      | NA               | NA                        |
| hsa-miR-4330     | NA           | -0.1807      | NA               | NA                        |
| hsa-miR-1201     | NA           | NA           | -3.48            | NA                        |
| hsa-miR-182-5p   | NA           | NA           | NA               | -14.7                     |
| hsa-miR-212-5p   | NA           | NA           | NA               | -16.5                     |
| hsa-miR-95-5p    | NA           | NA           | NA               | -14.3                     |

NA: Data not available.
