# Supplementary material
Source: PubMed Central journal article supplement (PMC6517268)
Supplement: EMS81028-supplement-Supplementary_Table_S4.pdf [file EMS81028-supplement-Supplementary_Table_S4.pdf]

**Supplementary Table S4: List of the Primers**

| <b>Quantitative PCR (qPCR) primers</b> |                       |                    |                          |
|----------------------------------------|-----------------------|--------------------|--------------------------|
| <b>Sr. No.</b>                         | <b>Gene</b>           | <b>Primer Name</b> | <b>Sequence (5'-3')</b>  |
| 1                                      | <i>SPINK1</i>         | SPINK1 FP          | GTCTGTGGGACTGATGGAAATA   |
|                                        |                       | SPINK1 RP          | GAGGATAGAAGTCTGGCGTTTC   |
| 2                                      | <i>ERG</i>            | ERG FP             | CGCAGAGTTATCGTGCCAGCAGAT |
|                                        |                       | ERG RP             | CCATATTCTTTCACCGCCCACTCC |
| 3                                      | <i>CDK1</i>           | CDK1 FP            | CAGGATGTGCTTATGCAGGA     |
|                                        |                       | CDK1 RP            | TGACTGACCAGGAGGGATAG     |
| 4                                      | <i>CDK6</i>           | CDK6 FP            | CGTGGTCAGGTTGTTTGATG     |
|                                        |                       | CDK6 RP            | CGGGCTCTGGAAC TTTATCC    |
| 5                                      | <i>CCNA2</i>          | CCNA2 FP           | GGTGGTCTGTGTTCTGTGAATA   |
|                                        |                       | CCNA2 RP           | ACTTCTTGGATGCCAGTCTTAC   |
| 6                                      | <i>CCNE2</i>          | CCNE2 FP           | CTAGTCCAGTGAAGCTGAAGAC   |
|                                        |                       | CCNE2 RP           | CTTCCTCCAGCATAGCCAAATA   |
| 7                                      | <i>MCM3</i>           | MCM3 FP            | CGCCTCACAGAATCCATCAA     |
|                                        |                       | MCM3 RP            | CCTGATTGTCATCCTGCATCT    |
| 8                                      | <i>MCM10</i>          | MCM10 FP           | CAGTAACTGTGGCCTCTACAA    |
|                                        |                       | MCM10 RP           | GGTAACAGAGTTTCTCCTCCTATC |
| 9                                      | <i>TWIST</i>          | TWIST FP           | CCAGGTACATCGACTTCTCTA    |
|                                        |                       | TWIST RP           | CCATCCTCCAGACCGAGAA      |
| 10                                     | <i>N-CAD</i>          | N-CAD FP           | TGACTCCCTGTAGTGTGTTGAC   |
|                                        |                       | N-CAD RP           | CCCAGTCGTTCAAGTAATCATAG  |
| 11                                     | <i>SLUG</i>           | SLUG FP            | GGTTGCTTCAAGGACACATTAG   |
|                                        |                       | SLUG RP            | GCAGATGAGCCCTCAGATTT     |
| 12                                     | <i>VIMENTIN</i>       | VIMENTIN FP        | GATTCCTCCCTCTGGTTGATAC   |
|                                        |                       | VIMENTIN RP        | GTCATCGTGATGCTGAGAAGT    |
| 13                                     | <i>EPCAM</i>          | EPCAM FP           | GCAGTTGTTGCTGGAATTGT     |
|                                        |                       | EPCAM RP           | GCATCTCACCCATCTCCTTTAT   |
| 14                                     | <i>AURKA</i>          | AURKA FP           | ATGCCCTGTCTTACTGTCATTC   |
|                                        |                       | AURKA RP           | GCATGTACTGACCACCCAAA     |
| 15                                     | <i>SOX2</i>           | SOX2 FP            | CATGGGTTCGGTGGTCAAG      |
|                                        |                       | SOX2 RP            | TGATCATGTCCCGGAGGT       |
| 16                                     | <i>SOX9</i>           | SOX9 FP            | TCTACTCCACCTTCACCTACAT   |
|                                        |                       | SOX9 RP            | CTGTGTGTAGACGGGTTGTT     |
| 17                                     | <i>c-Kit</i>          | c-Kit FP           | CAAGGCTTCTCCAATTCTGC     |
|                                        |                       | c-Kit RP           | TGCAGTGGTCCACAGAAGAG     |
| 18                                     | <i>Oct-4 (POU5F1)</i> | Oct-4 FP           | GGAGGAAGCTGACAATGAAA     |

|    |                          |          |                             |
|----|--------------------------|----------|-----------------------------|
|    |                          | Oct-4_RP | GGCCTGCACGAGGTTTT           |
| 19 | <i>CD44</i>              | CD44_FP  | CAGCACTTCAGGAGGTTACAT       |
|    |                          | CD44_RP  | GTAGCAGGGATTCTGTCTGTG       |
| 20 | <i>ABCG2</i>             | ABCG2_FP | GTA AAG CAG GGC ATC GAT CT  |
|    |                          | ABCG2_RP | CAG GTA GGC AAT TGT GAG GAA |
| 21 | <i>TET1</i>              | TET1_FP  | GGAAGGAATGGACAAGA           |
|    |                          | TET1_RP  | ATCGCAGCCCTCTTCTTTC         |
| 22 | <i>AATK</i>              | AATK_FP  | GATGGTGGCTATGAGGTCTTC       |
|    |                          | AATK_RP  | GACTCATAGTTCTCGGTGTCATAG    |
| 23 | <i>FTX</i>               | FTX_FP   | TTGCCTCAGAGGGACAAATC        |
|    |                          | FTX_RP   | CCCATAGTGCTTCACTGGTAAT      |
| 24 | <i>EZH2</i>              | EZH2_FP  | TGCAGTTGCTTCAGTACCCATAAT    |
|    |                          | EZH2_RP  | ATCCCCGTGTACTTTCCCATCATAAT  |
| 25 | <i>SUZ12</i>             | SUZ12_FP | CATTGCTCACCCGGTATGTT        |
|    |                          | SUZ12_RP | GCGTTCTTTCCTTGGTTTGC        |
| 26 | <i>RBBP4</i>             | RBBP4_FP | GTAGAGAGCTCTTCAGCAAGAC      |
|    |                          | RBBP4_RP | AGGAACAGCTGGAGGAAATG        |
| 27 | <i>RBBP7</i>             | RBBP7_FP | GGAGGACACACTGCTAAGATT       |
|    |                          | RBBP7_RP | CAGCCATTTGCCATATCTGC        |
| 28 | <i>MTF2</i>              | MTF2_FP  | ACAGCAGCATTCTTCTCAGG        |
|    |                          | MTF2_RP  | CACTGTTGTTACACCCTTCT        |
| 29 | <i>GAPDH</i>             | GAPDH_FP | TGCACCACCAACTGCTTAGC        |
|    |                          | GAPDH_RP | GGCATGGACTGTGGTCATGAG       |
| 30 | Human <i>ALU</i> repeats | qALU-F   | ACGCCTGTAATCCCAGCACTT       |
|    |                          | qALU-R   | TCGCCCAGGCTGGAGTGCA         |

### Chromatin Immunoprecipitation (CHIP-PCR) primers

| Sr. No. | Gene               | Primer Name           | Sequence (5'-3')       |
|---------|--------------------|-----------------------|------------------------|
| 1       | MiR-338-5p-EZH2-P1 | MiR-338-5p-EZH2-P1_FP | GGGACATGCTGGAAGAAGTG   |
|         |                    | MiR-338-5p-EZH2-P1_RP | GCACCAGGATATTGTTGGAGAG |
| 2       | MiR-338-5p-EZH2-P2 | MiR-338-5p-EZH2-P2_FP | GGACCTCAAGGGCTACCT     |
|         |                    | MiR-338-5p-EZH2-P2_RP | CCTCACCTGTGCACGAAAT    |
| 3       | MiR-421-EZH2-P1    | MiR-421-EZH2-P1_FP    | GTGTTTGTGCATAGGCACTCT  |
|         |                    | MiR-421-EZH2-P1_RP    | GATCCATGAAGTCCTCCCA    |

|   |             |                |                        |
|---|-------------|----------------|------------------------|
| 4 | FTX-EZH2-P1 | FTX-EZH2-P1 FP | TTAGACTCCTAGAGGCTGGAGA |
|   |             | FTX-EZH2-P1 RP | GCAACGCTGATGCCAGAAA    |
| 5 | FTX-EZH2-P2 | FTX-EZH2-P2 FP | GACAAGAACAGGCCTTGTAGTA |
|   |             | FTX-EZH2-P2 RP | TAAGAGGCAGTAGACCACCA   |
| 6 | MYT1-EZH2   | MYT1-EZH2 FP   | AAGGGTTCATGGGTAGCGTA   |
|   |             | MYT1-EZH2 RP   | GCGAACTCCTAAGCCAGCTA   |

### Methylated DNA immunoprecipitation (MeDIP-PCR) primers

| Sr. No. | Gene          | Primer Name      | Sequence (5'-3')         |
|---------|---------------|------------------|--------------------------|
| 1       | miR-338-5p-R1 | miR-338-5p-R1 FP | AAAGGCTCCTTTGTTGGG       |
|         |               | miR-338-5p-R1 RP | GAATGGGCCAGTGTGCT        |
| 2       | miR-338-5p-R2 | miR-338-5p-R2 FP | GGGAGAGTAACACGAAAGACTC   |
|         |               | miR-338-5p-R2 RP | CTGCTGATGCCAGAGTTCA      |
| 3       | miR-338-5p-R3 | miR-338-5p-R3 FP | GGACCTCAAGGGCTACCT       |
|         |               | miR-338-5p-R3 RP | TCTGCATAGTGGTTGTCTGATG   |
| 4       | FTX-R1        | FTX-R1 FP        | AGGGCTCCCACCTGTAAT       |
|         |               | FTX-R1 RP        | ATCTCTGCCTCCAGGTT        |
| 5       | FTX-R2        | FTX-R2 FP        | CCACCTCAGCCTTCTGAATAG    |
|         |               | FTX-R2 RP        | CCTATGCCTGATGTTGAAATTTGT |

### Bisulfite Sequencing primers (BSP Primers)

| Sr. No. | Gene           | Primer Name       | Sequence (5'-3')               |
|---------|----------------|-------------------|--------------------------------|
| 1       | BSP-miR-338-5p | BSP-miR-338-5p FP | TTTAGAGAGAGAGAGAGAGAGGGTAG     |
|         |                | BSP-miR-338-5p RP | CCCAAAAACACCTATAAAACAAAC       |
| 2       | BSP-AATKa      | BSP-AATKa FP      | TTTTTTTAGTAGTTGGGATTATAGG      |
|         |                | BSP-AATKa RP      | TATACCCTTTAAAATAATAAACTTCATAAC |
| 3       | BSP-AATKb      | BSP-AATKb FP      | TAGTTTAYGGTAGGTGGAGATTTAGTTAGG |
|         |                | BSP-AATKb RP      | AAAACCCRAAAACACACCCCAAAC       |
| 4       | BSP-miR-421    | BSP-miR-421 FP    | TTTGTTGGTTTTAAAAATATTTTTTG     |
|         |                | BSP-miR-421 RP    | TAAACAACATAACAAAACCCCATCT      |
| 5       | BSP-FTX        | BSP-FTX FP        | GGTTAGGTGTAAGGGTTTTTATTTGTA    |
|         |                | BSP-FTX RP        | ACTACAATCTCTACCTCCCAAATTC      |

### Cloning Primers:

|   |         |            |                                 |
|---|---------|------------|---------------------------------|
| 1 | miR-338 | miR-338_FP | CTCGAGGGAGGGTTCTGTCCTGCTT       |
|   |         | miR-338_RP | GCGGCCGCGTCCCTCCCCACATAAAACC    |
| 2 | miR-421 | miR-421_FP | CTCGAGGGCTCTCGTCTACCAGACTTTA    |
|   |         | miR-421_RP | GCGGCCGCACATAATCAGGGCAGGCATTATC |
